# Supplementary material for: Studies on the Japanese soil-borne wheat mosaic virus movement protein highlight its ability to bind plant RNA
Source: Springer Nature journal article supplement (doi:10.1186/s12985-025-02757-z), 2025-05-07
Supplement: MOESM1 [file 12985_2025_2757_MOESM1_ESM.pdf]

## Supplementary data

### Studies on the Japanese soil-borne wheat mosaic virus movement protein highlight its ability to bind plant RNA

**Authors:** Claudia Janina Strauch<sup>1</sup>, Nico Sprotte<sup>1</sup>, Estefania Peña Lozano<sup>2</sup>, Emmanuel Boutant<sup>3,5</sup>, Khalid Amari<sup>4</sup>, Steffen Ostendorp<sup>2</sup>, Anna Ostendorp<sup>2</sup>, Julia Kehr<sup>2</sup>, Annette Niehl<sup>1\*</sup>

<sup>1</sup>Julius Kühn Institute (JKI) - Federal Research Centre for Cultivated Plants, Institute for Epidemiology and Pathogen Diagnostics, Messeweg 11-12, 38104 Brunswick, Germany

<sup>2</sup>Institute of Plant Science and Microbiology, University of Hamburg, Ohnhorststr. 18, 22609 Hamburg, Germany

<sup>3</sup>Laboratory of Bioimaging and Pathologies, CNRS UMR 7021, Faculty of Pharmacy, University of Strasbourg, 74 route du Rhin - CS 60024, F-67401 Illkirch, Strasbourg, France

<sup>4</sup>Julius Kühn Institute (JKI) - Federal Research Centre for Cultivated Plants, Institute for Biosafety in Plant Biotechnology, Erwin-Baur-Str. 27, 06484 Quedlinburg, Germany

<sup>5</sup>Biotechnology and Cell Signaling, CNRS UMR7242, ESBS, University of Strasbourg, Bld Sébastien Brant, F-67412 Illkirch, Strasbourg, France

\*corresponding author: [annette.niehl@julius-kuehn.de](mailto:annette.niehl@julius-kuehn.de)

**Table S1: Primer sequences**

| Primer name         | Sequence 5'-3'                                                             | Determination                                                                                |
|---------------------|----------------------------------------------------------------------------|----------------------------------------------------------------------------------------------|
| MP_GW_For1          | GGG GAC AAG TTT GTA CAA AAA AGC AGG CTT AAA CAT GAC AAC<br>TAA AGA TGT TTC | GATEWAY-cloning of MP <sup>JSBWMV</sup> , addition of attB-sites                             |
| MP_GW_Rev1          | GGG GAC CAC TTT GTA CAA GAA AGC TGG GTC CAC TAT GTT TTC<br>AGA GTC         | GATEWAY-cloning of MP <sup>JSBWMV</sup> , addition of attB-sites                             |
| MP_fw_GG            | TTA AGG TCT CGT TGC ATG ACA ACT AAA GAT GTT TCA AGT GAT TCC                | GoldenGate cloning of MP <sup>JSBWMV</sup> :GFP into <i>E.coli</i> expression plasmid pET28a |
| eGFP_rev_GG         | TTA AGG TCT CGA AGC TTA CTT GTA CAG CTC GTC CAT GC                         | GoldenGate cloning of MP <sup>JSBWMV</sup> :GFP into <i>E.coli</i> expression plasmid pET28a |
| eGFP_For            | GGGG ACA AGT TTG TAC AAA AAA GCA GGC TTC ATG GTG AGC AAG<br>GGC GAG        | GATEWAY-cloning of free GFP                                                                  |
| eGFP_Rev            | GGGG AC CAC TTT GTA CAA GAA AGC TGG GTC TTA CTT GTA CAG<br>CTC GTC CAT     | GATEWAY-cloning of free GFP                                                                  |
| MP_toRFP_NSp_For1   | CCG AAG ATG CTC CCT GAA CA                                                 | Modification of pJS1                                                                         |
| Bgl2_inRFP_NSp_Rev1 | GAA GAT CTT TAG GCG CCG GTG G                                              | Modification of pJS1                                                                         |
| RNA2_for            | GAT CTA ATA CGA CTC ACT ATA GTT GAG TGT TAA CTC TTC TTG                    | Full length RNA2 synthesis                                                                   |
| RNA2_rev            | CTC CGG TTC GGG GGG                                                        | RNA2 full length and tRNA-like structure-RNA2 synthesis                                      |
| tRNA2_for           | GAT CTA ATA CGA CTC ACT ATA TGT ATG TTC TGT TGA ACT ACT GT<br>ATG          | tRNA-like structure-RNA2 synthesis                                                           |
| tRNA1_for           | GAT CTA ATA CGA CTC ACT ATA CAT AGT GTG ATT ATT ACT ATT ATG<br>CTT T       | tRNA-like structure-RNA1 synthesis                                                           |
| tRNA1_rev           | CTC CGG TTC AGG GGG                                                        | tRNA-like structure-RNA1 synthesis                                                           |
| Non_tRNA1_for       | GAT CTA ATA CGA CTC ACT ATA AGT CGT TAG ACT GCT TAA AG                     | non tRNA1-like-structure synthesis                                                           |
| Non_tRNA1_rev       | TCA CAC TAT GTT TTC AGA GTC CAA                                            | non tRNA1-like-structure synthesis                                                           |
| Non_tRNA2_for       | GAT CTA ATA CGA CTC ACT ATA GTT GAG TGT TAA CTC TTC TTG                    | non tRNA2-like-structure synthesis                                                           |
| Non_tRNA2_rev       | TCA CAG AGG TTT AGA CTT CCT T                                              | non tRNA2-like-structure synthesis                                                           |

Figure S1:

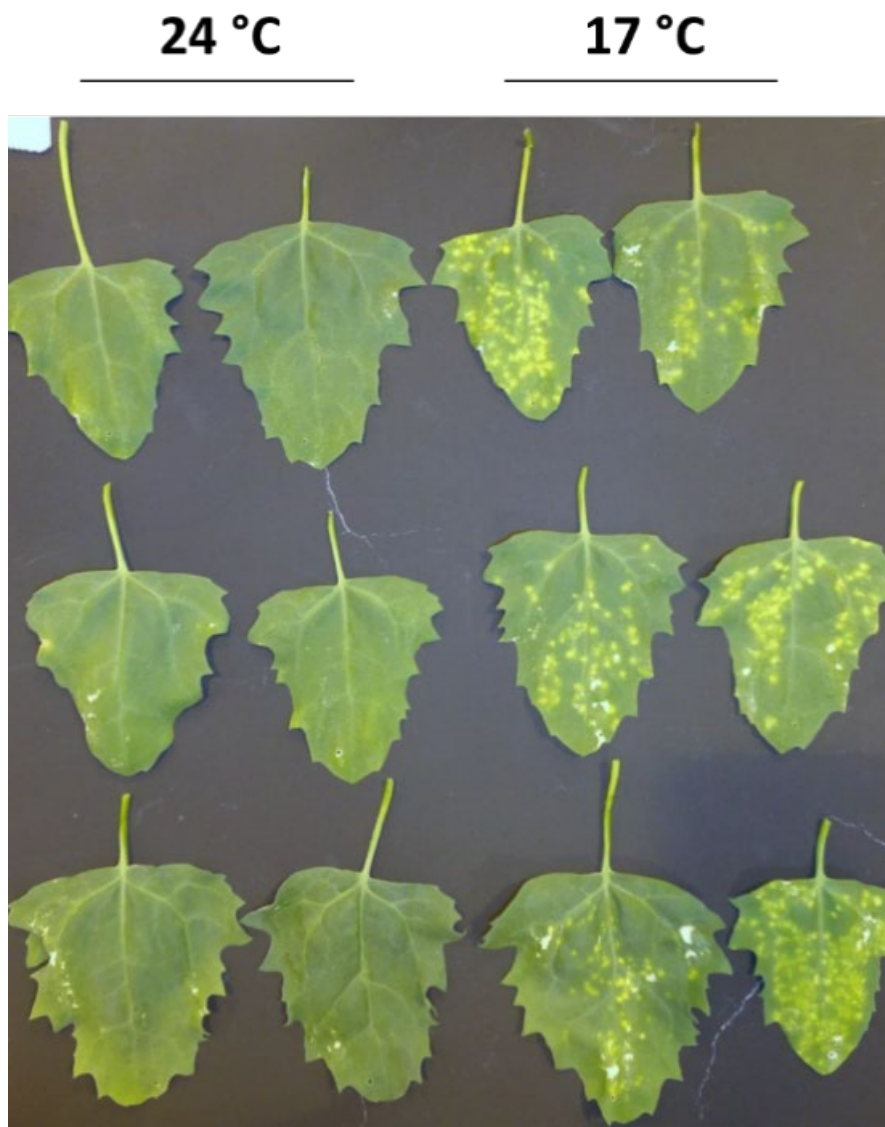

**Figure S1. JSBWMV forms visible infection sites on *Chenopodium quinoa* leaves at 17 °C but not at 24 °C.** *Chenopodium quinoa* leaves of five to six-week-old plants were infected with RNA in-vitro transcribed from pJS1 and pJS2 cDNA clones (Yamamiya and Shirako, 2000) and kept in the greenhouse with 16h light and 8h dark cycles and at least 200 W/m<sup>2</sup> light intensity either at 24°C or at 17°C. Multicellular infection sites visible as chlorotic spots were only obtained at 17°C. Pictures were taken 12 dpi.

**Figure S2:**

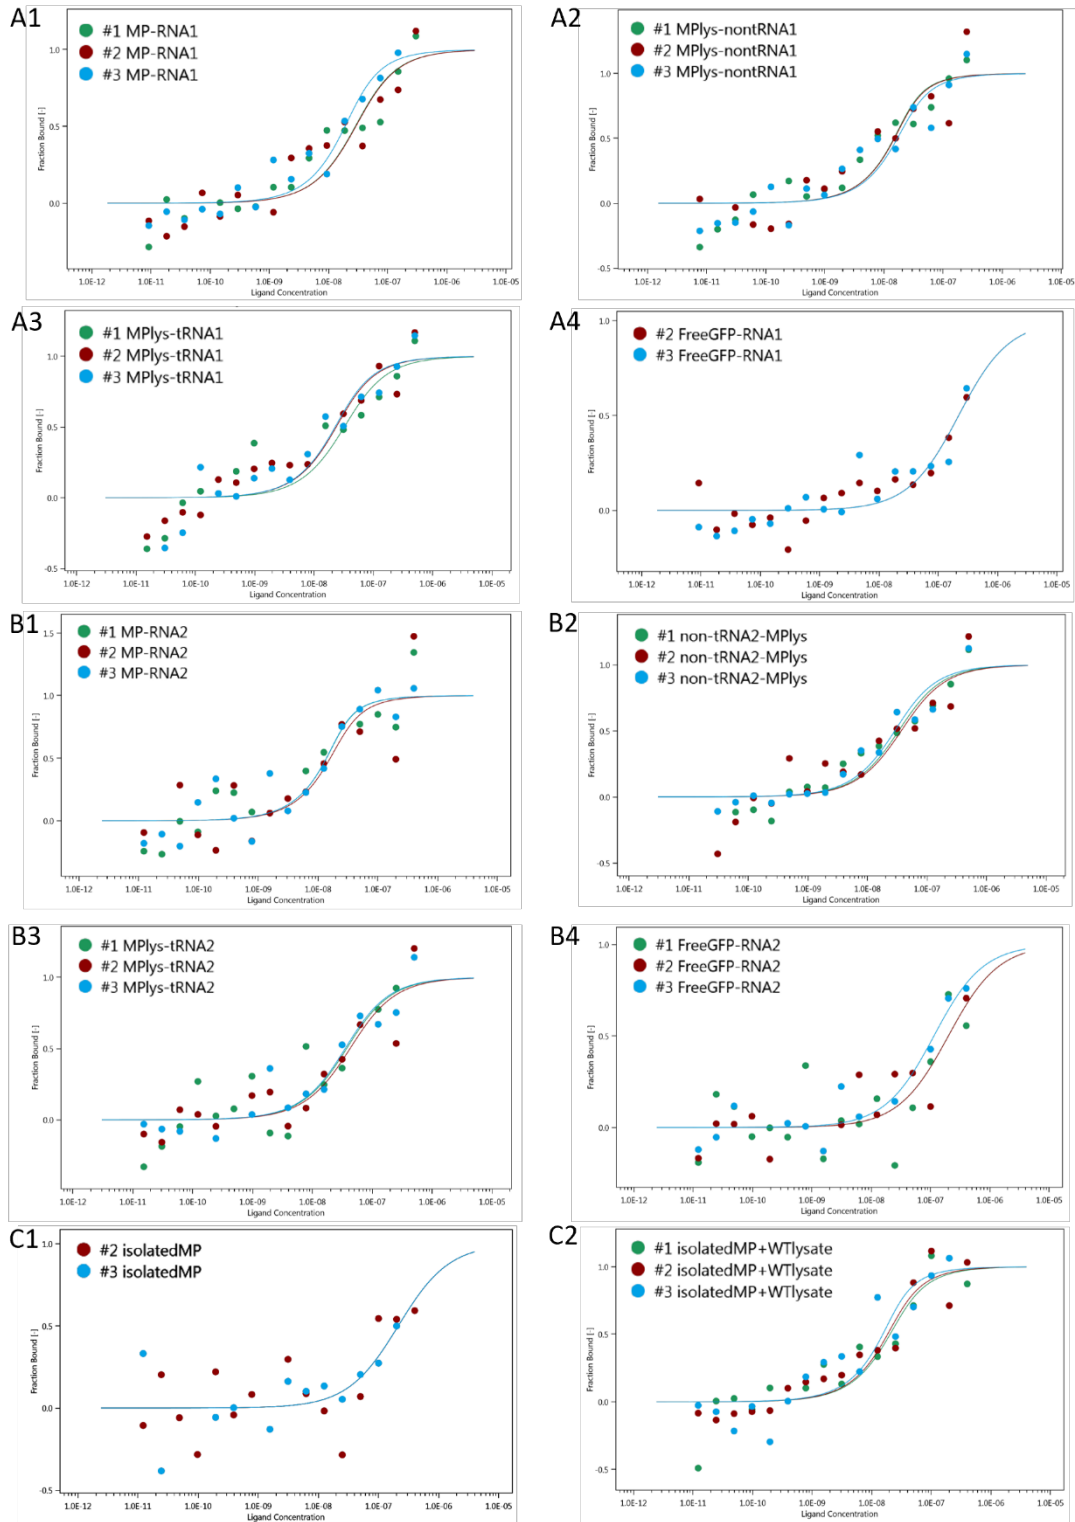

**Figure S2: Microscale thermophoresis binding curves for MP<sup>JBWMV</sup>:GFP or GFP, respectively to viral RNAs**

*N. benthamiana* leaf crude extracts expressing MP<sup>JSBWMV</sup> and GFP after agro-inoculation were used to analyze the binding affinity of **(A1)** MP<sup>JSBWMV</sup>:GFP to RNA1<sup>JSBWMV</sup>, **(A2)** MP<sup>JSBWMV</sup>:GFP to RNA1<sup>JSBWMV</sup>-non-tRNA, **(A3)** MP<sup>JSBWMV</sup>:GFP to tRNA1<sup>JSBWMV</sup>, **(A4)** GFP to RNA1<sup>JSBWMV</sup>, **(B1)** MP<sup>JSBWMV</sup>:GFP to RNA2<sup>JSBWMV</sup>, **(B2)** MP<sup>JSBWMV</sup>:GFP to RNA2<sup>JSBWMV</sup>-non-tRNA, **(B3)** MP<sup>JSBWMV</sup>:GFP to tRNA2<sup>JSBWMV</sup>, **(B4)** GFP to RNA2<sup>JSBWMV</sup>, **(C1)** MP<sup>JSBWMV</sup>:GFP isolated from bacteria to RNA2<sup>JSBWMV</sup>, **(C2)** MP<sup>JSBWMV</sup>:GFP to RNA2<sup>JSBWMV</sup> isolated from bacteria complemented with *N. benthamiana* leaf extract.

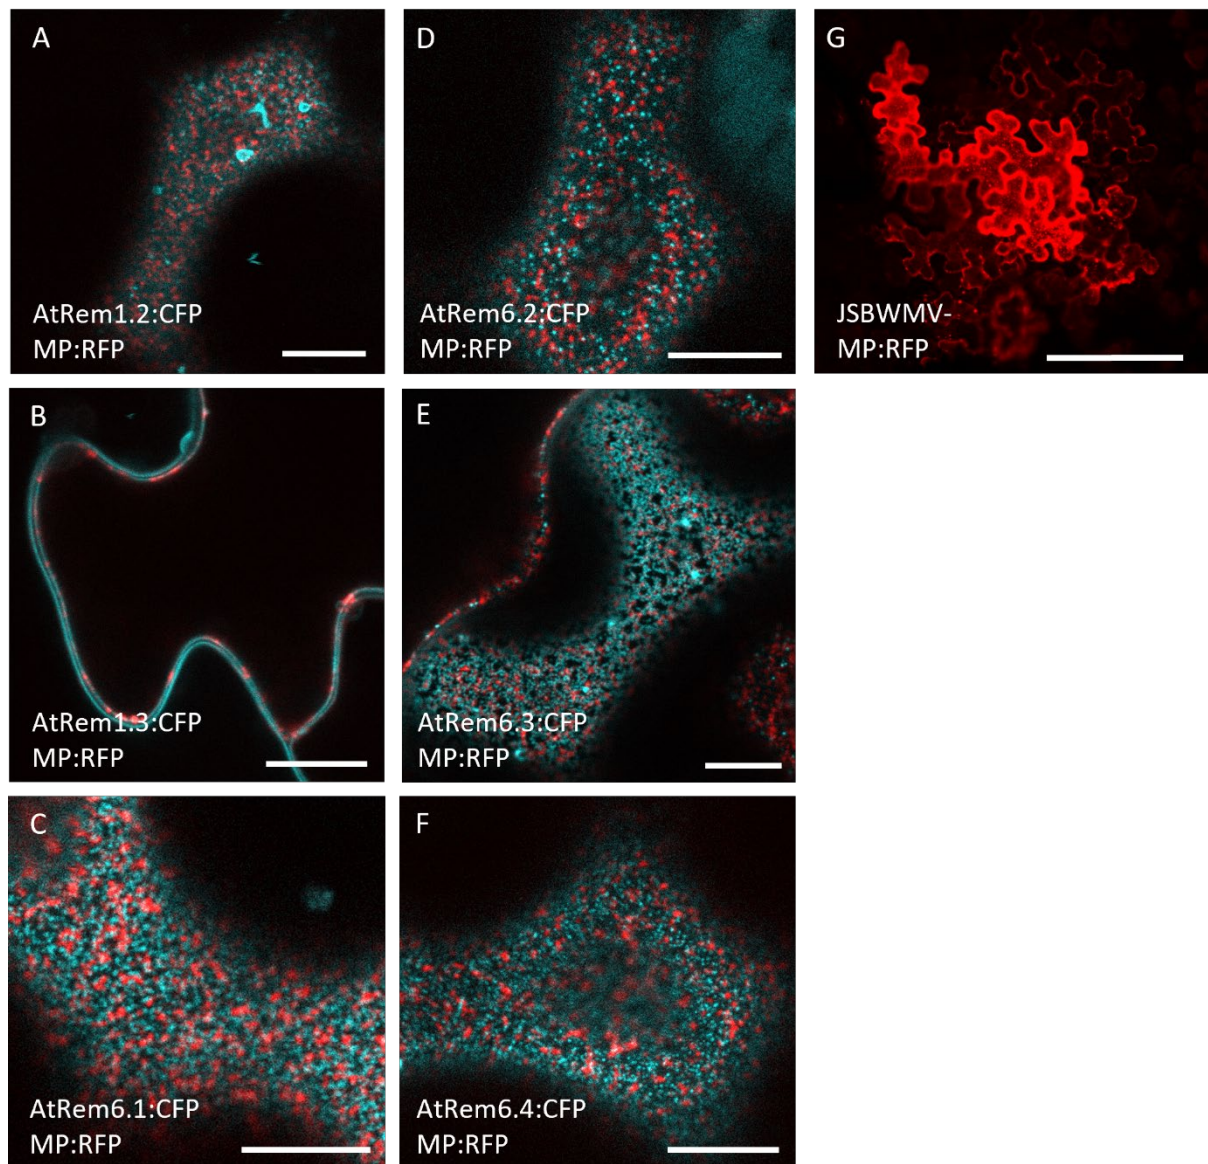

**Figure S3: MP<sup>JSBWMV</sup>:RFP localizes to membrane rafts.**

(A-F) MP<sup>JSBWMV</sup>:RFP was ectopically expressed in *N. benthamiana* epidermal cells via agroinoculation and co-expressed with different markers. (A-F) MP<sup>JSBWMV</sup>:RFP (red) co-expressed with (A) AtREM1.2:CFP (cyan); (B) AtREM1.3:CFP (cyan); (C) AtREM6.1:CFP (cyan); (D) AtREM6.2:CFP (cyan); (E) AtREM6.3:CFP (cyan); (F) AtREM6.4:CFP (cyan), remorins and MP<sup>JSBWMV</sup>:RFP localize in a patchy pattern at the cell periphery. The localizations do not overlap. Images taken two to five days post infiltration. Scale bars are 10 μm. (G) JSBWMV-MP:RFP infection site seven days after rub inoculation of RNA<sup>JSBWMV-MP:RFP</sup> into *N. benthamiana* epidermal cells. Scale bar is 200 μm.
